# Supplementary material for: Discovery of Galangin as a Potential DPP-4 Inhibitor That Improves Insulin-Stimulated Skeletal Muscle Glucose Uptake: A Combinational Therapy for Diabetes
Source: MDPI journal article supplement (doi:10.3390/ijms20051228), 2019-03-11
Supplement: s1 [file s1]

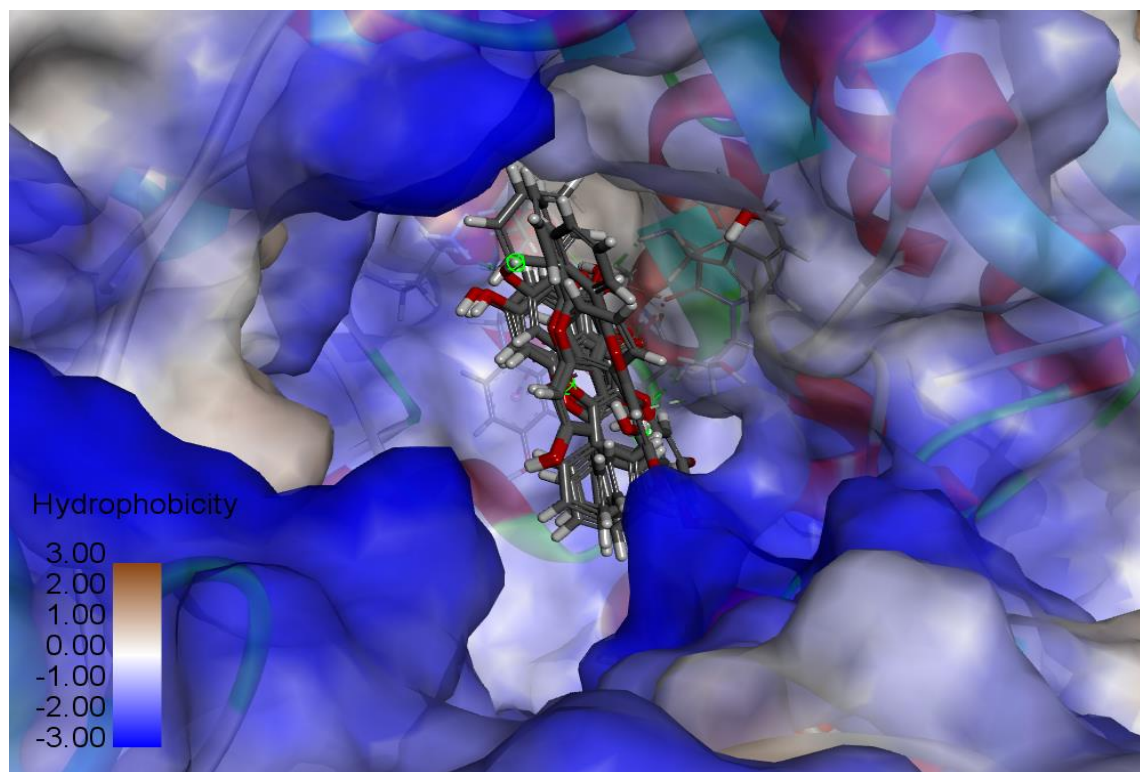

**Figure S1.** Top 10 docking poses of natural flavonoid Galangin at the druggable region of DPP4.

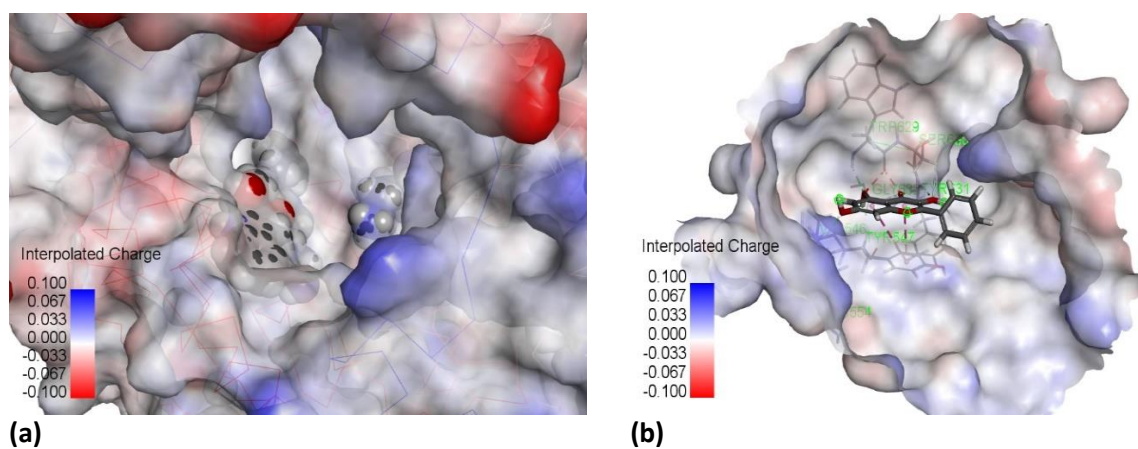

**Figure S2.** (a) The electrostatic charge surface of druggable region DPP4 glycoprotein and (b) galangin binding at the druggable region of DPP4. Blue color denotes positively charged and Red color denotes negatively charged.

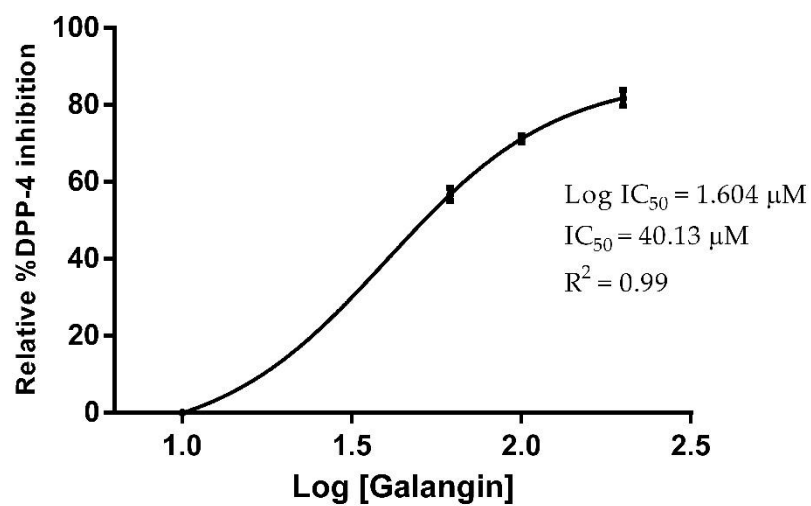

**Figure S3.** The dose-response curve of galangin inhibiting DPP4 at three different concentration.

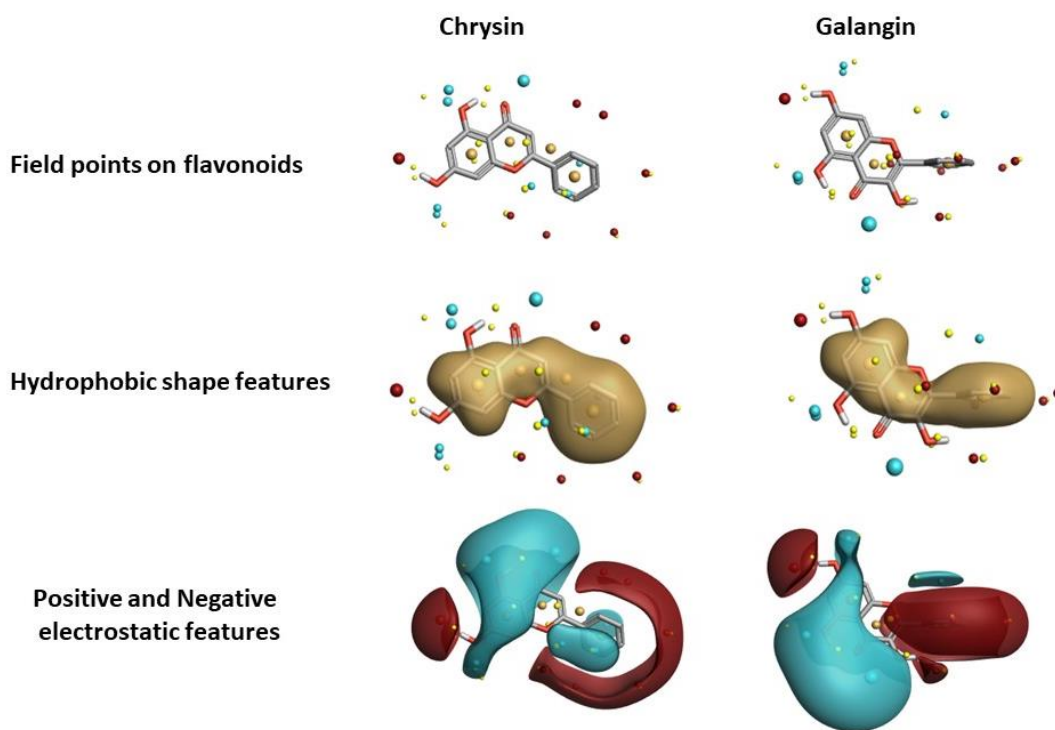

**Figure S4.** Molecular insights of Chrysin and Galangin calculated using activity cliff summary.
